# Supplementary material for: Nano N-TiO2 mediated selective photocatalytic synthesis of quinaldines from nitrobenzenes
Source: Royal Society of Chemistry journal article supplement (doi:10.1039/c2ra01178f), 2012-01-01
Supplement: c2ra01178f.pdf [file c2ra01178f.pdf]

## Spectral analysis of quinaldines

The products formed during photocatalytic synthesis were identified and their yields were determined by GC-MS. Structure of the products were confirmed by  $^1\text{H}$  and  $^{13}\text{C}$  NMR spectra.

**6-Methoxy-2-methylquinoline.**  $^1\text{H}$  NMR (500 MHz,  $\text{CDCl}_3$ ):  $\delta$  2.71 (s, 3H), 3.91 (s,  $\text{OCH}_3$ ), 7.22-7.94 (m, 5H);  $^{13}\text{C}$  NMR (125 MHz,  $\text{CDCl}_3$ ):  $\delta$  25.03 ( $\text{CH}_3$ ), 55.47 ( $\text{OCH}_3$ ), 127.3, 142.5, 156.33, 157.14 (*ipso* carbons), 121.83-134.99 (aromatic carbons).

**2,6-Dimethylquinoline.**  $^1\text{H}$  NMR (500 MHz,  $\text{CDCl}_3$ ):  $\delta$  2.5 (s, 3H), 2.72 (s,  $\text{CH}_3$ ), 7.21-7.93 (m, 5H);  $^{13}\text{C}$  NMR (125 MHz,  $\text{CDCl}_3$ ):  $\delta$  25.26, 21.44 ( $\text{CH}_3$ ), 128.2, 135.4, 146.4, 157.9 (*ipso* carbons), 121.90-135.30 (aromatic carbons).

**2,8-Dimethylquinoline.**  $^1\text{H}$  NMR (500 MHz,  $\text{CDCl}_3$ ):  $\delta$  2.84 (s, 3H), 2.78 (s,  $\text{CH}_3$ ), 7.28-8.03 (m, 5H);  $^{13}\text{C}$  NMR (125 MHz,  $\text{CDCl}_3$ ):  $\delta$  25.69, 17.97 ( $\text{CH}_3$ ), 126.3, 136.53, 147.0, 157.8 (*ipso* carbons), 121.61-136.24 (aromatic carbons).

**2,7-Dimethylquinoline.**  $^1\text{H}$  NMR (500 MHz,  $\text{CDCl}_3$ ):  $\delta$  2.55 (s, 3H), 2.35 (s,  $\text{CH}_3$ ), 7.03-7.90 (m, 5H);  $^{13}\text{C}$  NMR (125 MHz,  $\text{CDCl}_3$ ):  $\delta$  25.2, 24.3 ( $\text{CH}_3$ ), 124.5, 139.1, 146.7, 158.7 (*ipso* carbons), 121.71-129.34 (aromatic carbons).

**6-Ethoxyquinaldine.**  $^1\text{H}$  NMR (500 MHz,  $\text{CDCl}_3$ ):  $\delta$  2.51 (s, 3H), 1.35 (t,  $\text{CH}_3$ ), 3.99 (t,  $\text{CH}_2$ ), 6.98-7.95 (m, 5H);  $^{13}\text{C}$  NMR (125 MHz,  $\text{CDCl}_3$ ):  $\delta$  25.2 ( $\text{CH}_3$ ), 14.8,  $\text{OCH}_2\text{CH}_3$ , 64.8 ( $\text{OCH}_2\text{CH}_3$ ), 124.5, 139.1, 146.7, 158.7 (*ipso* carbons), 121.71-129.34 (aromatic carbons).

**2,5,7-Trimethylquinoline.**  $^1\text{H}$  NMR (500 MHz,  $\text{CDCl}_3$ ):  $\delta$  2.55 (s, 3H), 2.35 (s,  $\text{CH}_3$ ), 2.35 (s,  $\text{CH}_3$ ), 7.08-8.05 (m, 4H);  $^{13}\text{C}$  NMR (125 MHz,  $\text{CDCl}_3$ ):  $\delta$  25.2 ( $\text{CH}_3$ ), 22.5 ( $\text{CH}_3$ ), 24.6 ( $\text{CH}_3$ ), 123.3, 139.7, 146.5, 158.0 (*ipso* carbons), 120.5-131.0 (aromatic carbons).

**5,7-Dimethoxy-2-methylquinoline.**  $^1\text{H}$  NMR (500 MHz,  $\text{CDCl}_3$ ):  $\delta$  2.55 (s, 3H), 3.71 (s,  $\text{OCH}_3$ ), 3.71 (s,  $\text{OCH}_3$ ), 6.48-8.41 (m, 4H);  $^{13}\text{C}$  NMR (125 MHz,  $\text{CDCl}_3$ ):  $\delta$  25.2 ( $\text{CH}_3$ ), 55.9 ( $\text{OCH}_3$ ), 56.3 ( $\text{OCH}_3$ ), 147.6, 155.1, 159.0, 159.8 (*ipso* carbons), 110.1-129.0 (aromatic carbons).

**Table 3.3.6. GC-MS spectral data of quinaldines**

| Run | Product                         | Retention time (min) | GC-MS (m/z)                                                          |
|-----|---------------------------------|----------------------|----------------------------------------------------------------------|
| 1   | 2-Methylquinoline               | 10.8                 | 143.0 ( $\text{M}^+$ ) (128.0, 116.2, 100.0, 89.5, 75.1, 63.2, 50.1) |
| 2   | 2,3-Dimethylindole              | 11.4                 | 145.0 (130.3, 115.3, 103.4, 77.0, 67.1)                              |
| 3   | 2,8-Dimethylquinoline           | 12.2                 | 157.1 (142.0, 128.0, 115.3, 89.0, 77.0, 51.0)                        |
| 4   | 2,7-Dimethylquinoline           | 12.3                 | 157.0 (141.9, 115.0, 89.0, 63.0, 51.0)                               |
| 5   | 2,6-Dimethylquinoline           | 12.0                 | 157.0 (141.9, 115.0, 89.0, 63.0, 51.0)                               |
| 6   | 6-Methoxy-2-methylquinoline     | 14.3                 | 173.0 (158.1, 130.2, 103.1, 77.1, 63.1, 51.0)                        |
| 7   | 5-Methoxy-2-methylquinoline     | 16.1                 | 173.0 (158.1, 130.2, 103.1, 77.1, 63.1, 51.0)                        |
| 8   | 7-Methoxy-2-methylquinoline     | 16.8                 | 173.0 (158.1, 130.2, 103.1, 77.1, 63.1, 51.0)                        |
| 9   | 2,5,7-Trimethylquinoline        | 14.5                 | 171.0 (152.0, 115.0, 77.0, 63.0, 51.0)                               |
| 10  | 2,5,6-Trimethylquinoline        | 13.9                 | 171.0 (152.0, 115.0, 77.0, 63.0, 51.0)                               |
| 10  | 5,7-Dimethoxy-2-methylquinoline | 14.4                 | 203.3 (181.2, 160.1, 117.0, 102.0)                                   |
| 11  | 6-Ethoxyquinaldine              | 14.8                 | 187.0 (159.0, 130.0, 115.0, 103.0, 89.0, 77.0, 63.0, 51.0)           |
| 12  | 6-Chloro-2-methylquinoline      | 11.5                 | 177.1 (142.1, 115.0, 77.3, 65.0, 51.0)                               |
| 13  | 6-Fluoro-2-methylquinoline      | 10.5                 | 160.0 (133.0, 126.0, 108.0, 99.0, 67.0, 57.0, 51.0)                  |

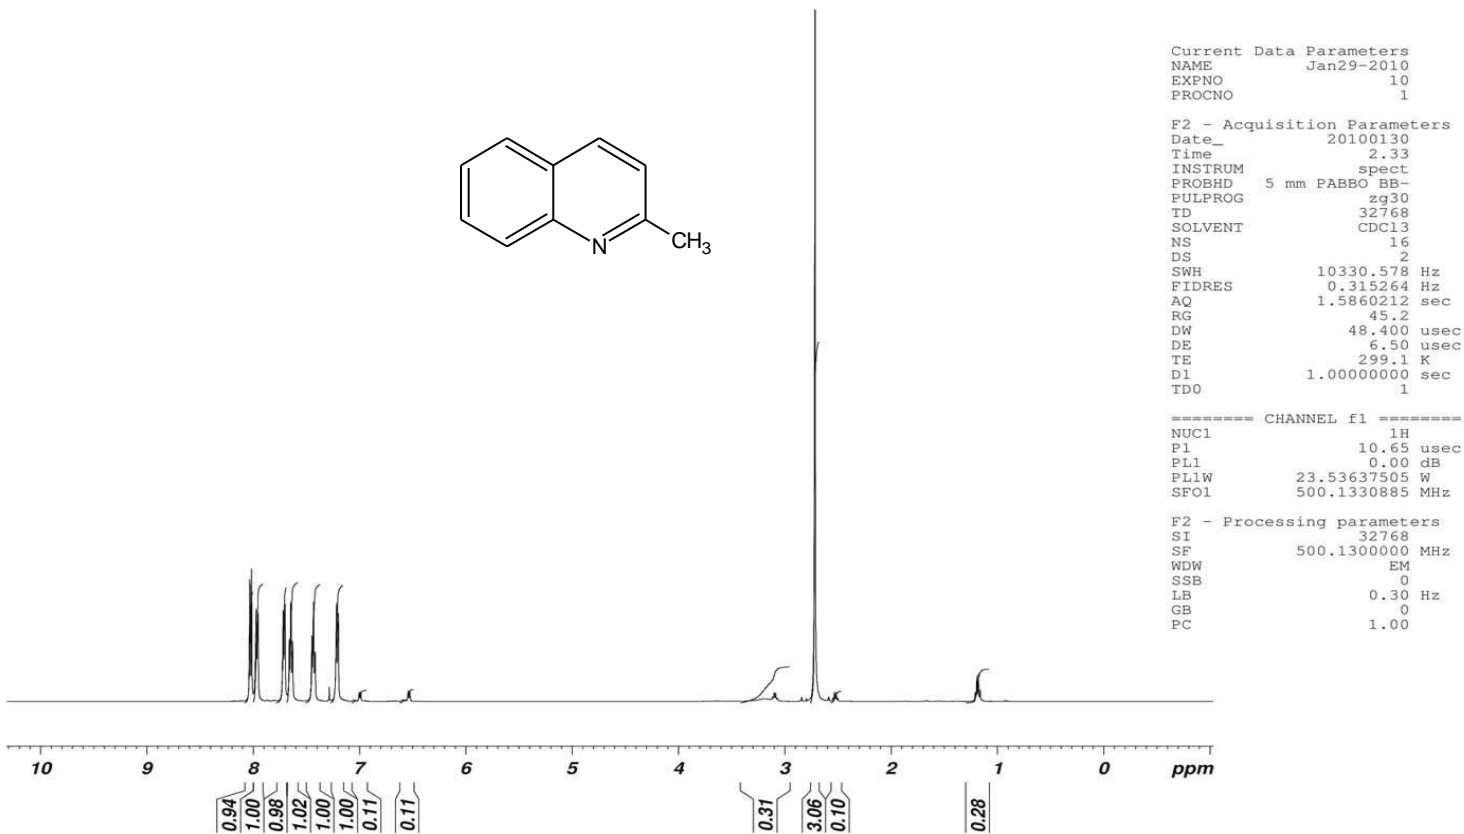

<sup>1</sup>H NMR spectrum of quinaldine

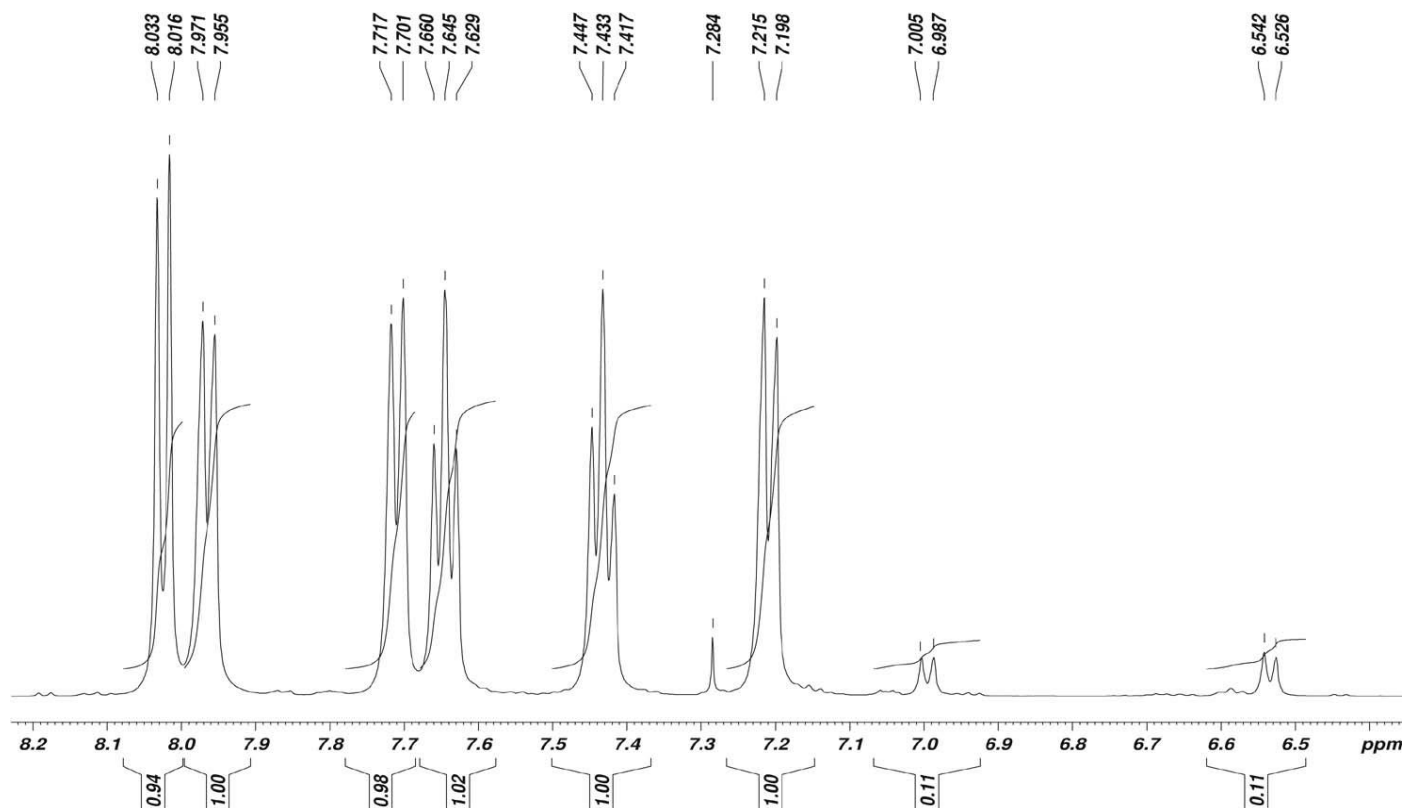

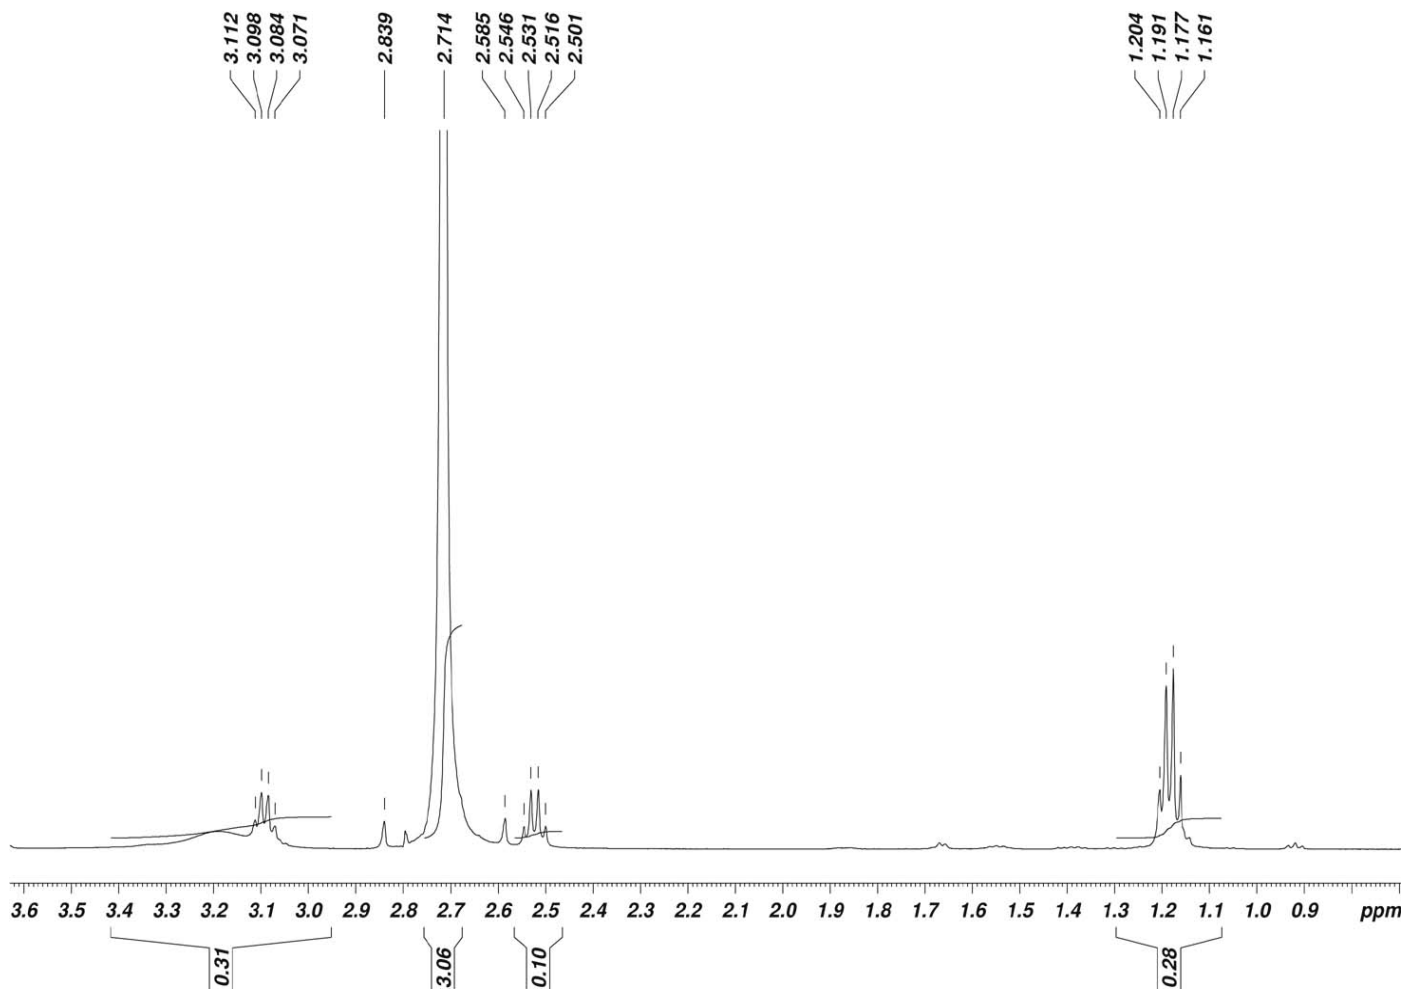

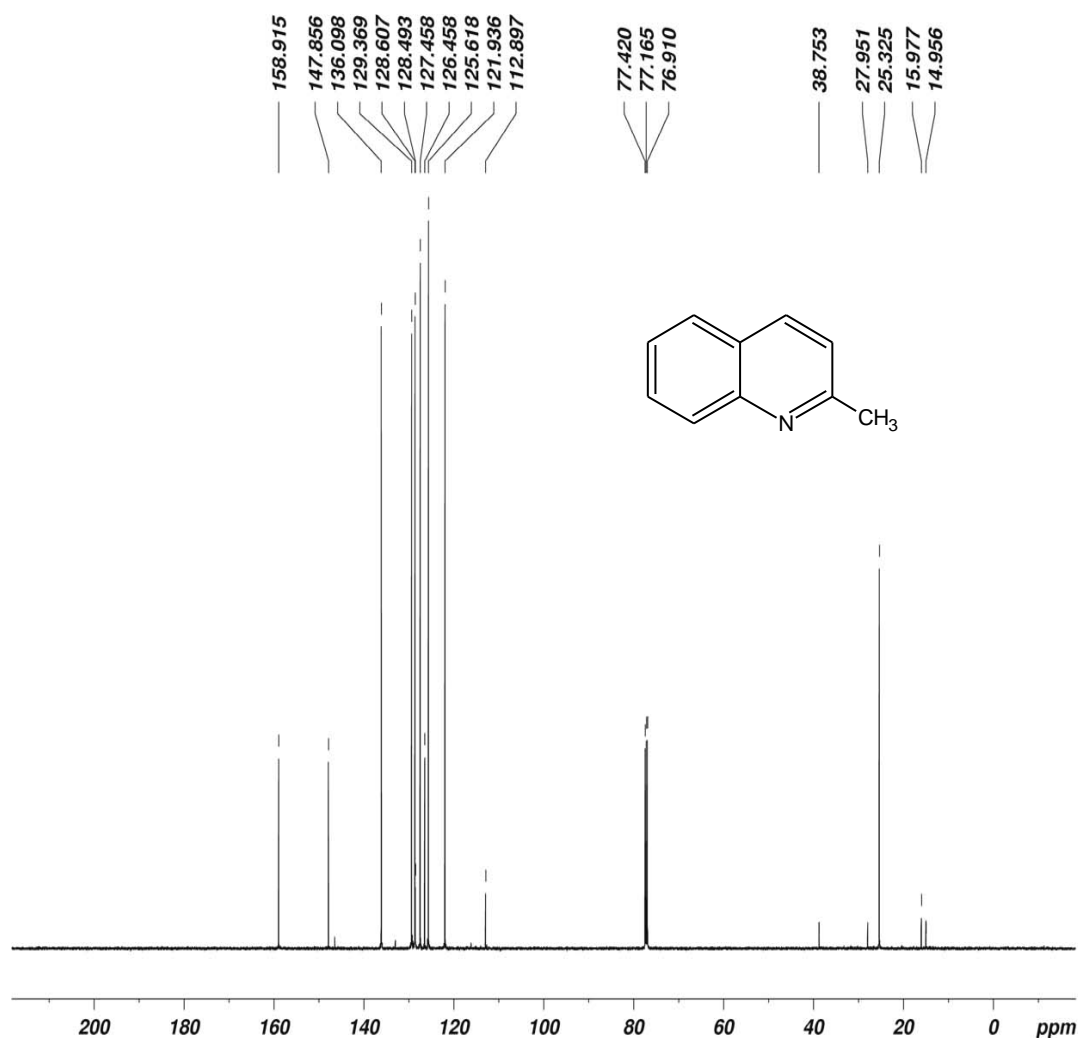

Current Data Parameters  
NAME Jan29-2010  
EXPNO 11  
PROCNO 1

F2 - Acquisition Parameters  
Date\_ 20100130  
Time 3.19  
INSTRUM spect  
PROBHD 5 mm PABBO BB-  
PULPROG zgpg30  
TD 32768  
SOLVENT CDC13  
NS 1024  
DS 4  
SWH 29761.904 Hz  
FIDRES 0.908261 Hz  
AQ 0.5505524 sec  
RG 203  
DW 16.800 usec  
DE 6.50 usec  
TE 300.8 K  
D1 2.00000000 sec  
D11 0.03000000 sec  
TD0 1

===== CHANNEL f1 =====  
NUC1 13C  
P1 7.80 usec  
PL1 0.00 dB  
PL1W 70.83519745 W  
SFO1 125.7703643 MHz

===== CHANNEL f2 =====  
CPDPRG2 waltz16  
NUC2 1H  
PCPD2 80.00 usec  
PL2 0.00 dB  
PL12 17.50 dB  
PL13 17.50 dB  
PL2W 23.53637505 W  
PL12W 0.41854253 W  
PL13W 0.41854253 W  
SFO2 500.1320005 MHz

F2 - Processing parameters  
SI 32768  
SF 125.7577890 MHz  
WDW EM  
SSB 0  
LB 1.00 Hz  
GB 0  
PC 1.40

<sup>13</sup>C NMR spectrum of quinaldine
